# Supplementary material for: Complex modifier landscape underlying genetic background effects
Source: PubMed Central journal article supplement — Proc Natl Acad Sci U S A. 2019 Feb 25;116(11):5045–54. doi: 10.1073/pnas.1820915116 (PMC6421401; doi:10.1073/pnas.1820915116), 2019-02-25
Supplement: pnas.1820915116.sapp.pdf [file pnas.1820915116.sapp.pdf]

# PNAS

www.pnas.org

Jing Hou<sup>1</sup>, Guihong Tan<sup>1</sup>, Gerald R. Fink<sup>2</sup>, Brenda J. Andrews<sup>1</sup>, Charles Boone<sup>1</sup>

<sup>1</sup>*Donnelly Centre for Cellular and Biomolecular Research, University of Toronto, 160 College Street, Toronto, Ontario M5S 3E1, Canada.*

<sup>2</sup>*Whitehead Institute for Biomedical Research, 9 Cambridge Center, Cambridge 02142 MA, USA*

## Supplementary Information for

### **The complex modifier landscape underlying genetic background effects**

Jing Hou, Guihong Tan, Gerald R. Fink, Brenda J. Andrews, Charles Boone

Brenda Andrews, Charles Boone

Emails: [brenda.andrews@utoronto.ca](mailto:brenda.andrews@utoronto.ca); [charlie.boone@utoronto.ca](mailto:charlie.boone@utoronto.ca)

#### **This PDF file includes:**

Figs. S1 and S2

Captions for tables S1 and S2

## Supplementary materials

**Figure S1- Allele frequency variation and segregation patterns for 7 conditional essential genes. A-G.** Raw allele frequencies (in grey) are presented for each segregant pool, with the y-axis indicating the allele frequency of S288c and x-axis the chromosome coordinates. Average allele frequency within a 20 kb window is indicated in blue for simplification. The segregation patterns in heterozygous deletion hybrids, homozygous deletion hybrids and the final segregation patterns in the bulk segregant pools are presented in bar plots. Schematic illustrations of modifier segregation modes are presented for *CYS3*, *LSM6*, *SWI6* and *OST4*. For cases with fitness variation, the upper panel corresponds to the segregant pool with normal fitness and the lower panel corresponds to the pool with low fitness segregants. **H.** Allele frequency distribution across all bulk segregant pools. K-smoothed allele frequency values are combined across different chromosomes for all tested pools. Vertical dashed lines indicate the mean allele frequency value (0.52, green) and  $\pm 2.5X$  standard deviations from the mean (0.29 and 0.75, orange). Genomic regions with allele frequency deviations surpassing the cutoffs of  $\pm 2.5X$  standard deviations and spanning more than 10 kb in size are considered as significant, as highlighted in **A-G**.

**Figure S2- Sequence alignments. A.** DNA alignment of the promoter region of *OPT1* in S288c and  $\Sigma 1278b$ . **B.** Allelic variations of *MET1* in S288c,  $\Sigma 1278b$ , Y12, K12 and K12\_2. Protein sequence alignments are shown.

**Table S1- Segregation patterns observed in S288c/ $\Sigma 1278b$  hybrids with deletions of 57 conditional essential genes.**

**Table S2- Yeast strains used in this study.** Origin of the wild isolates and their fitness ratios after deletion of *CYS3* are indicated. Strains generated in this study and their genotypes are also included.

Figure S1

Segregation patterns in hybrid offspring

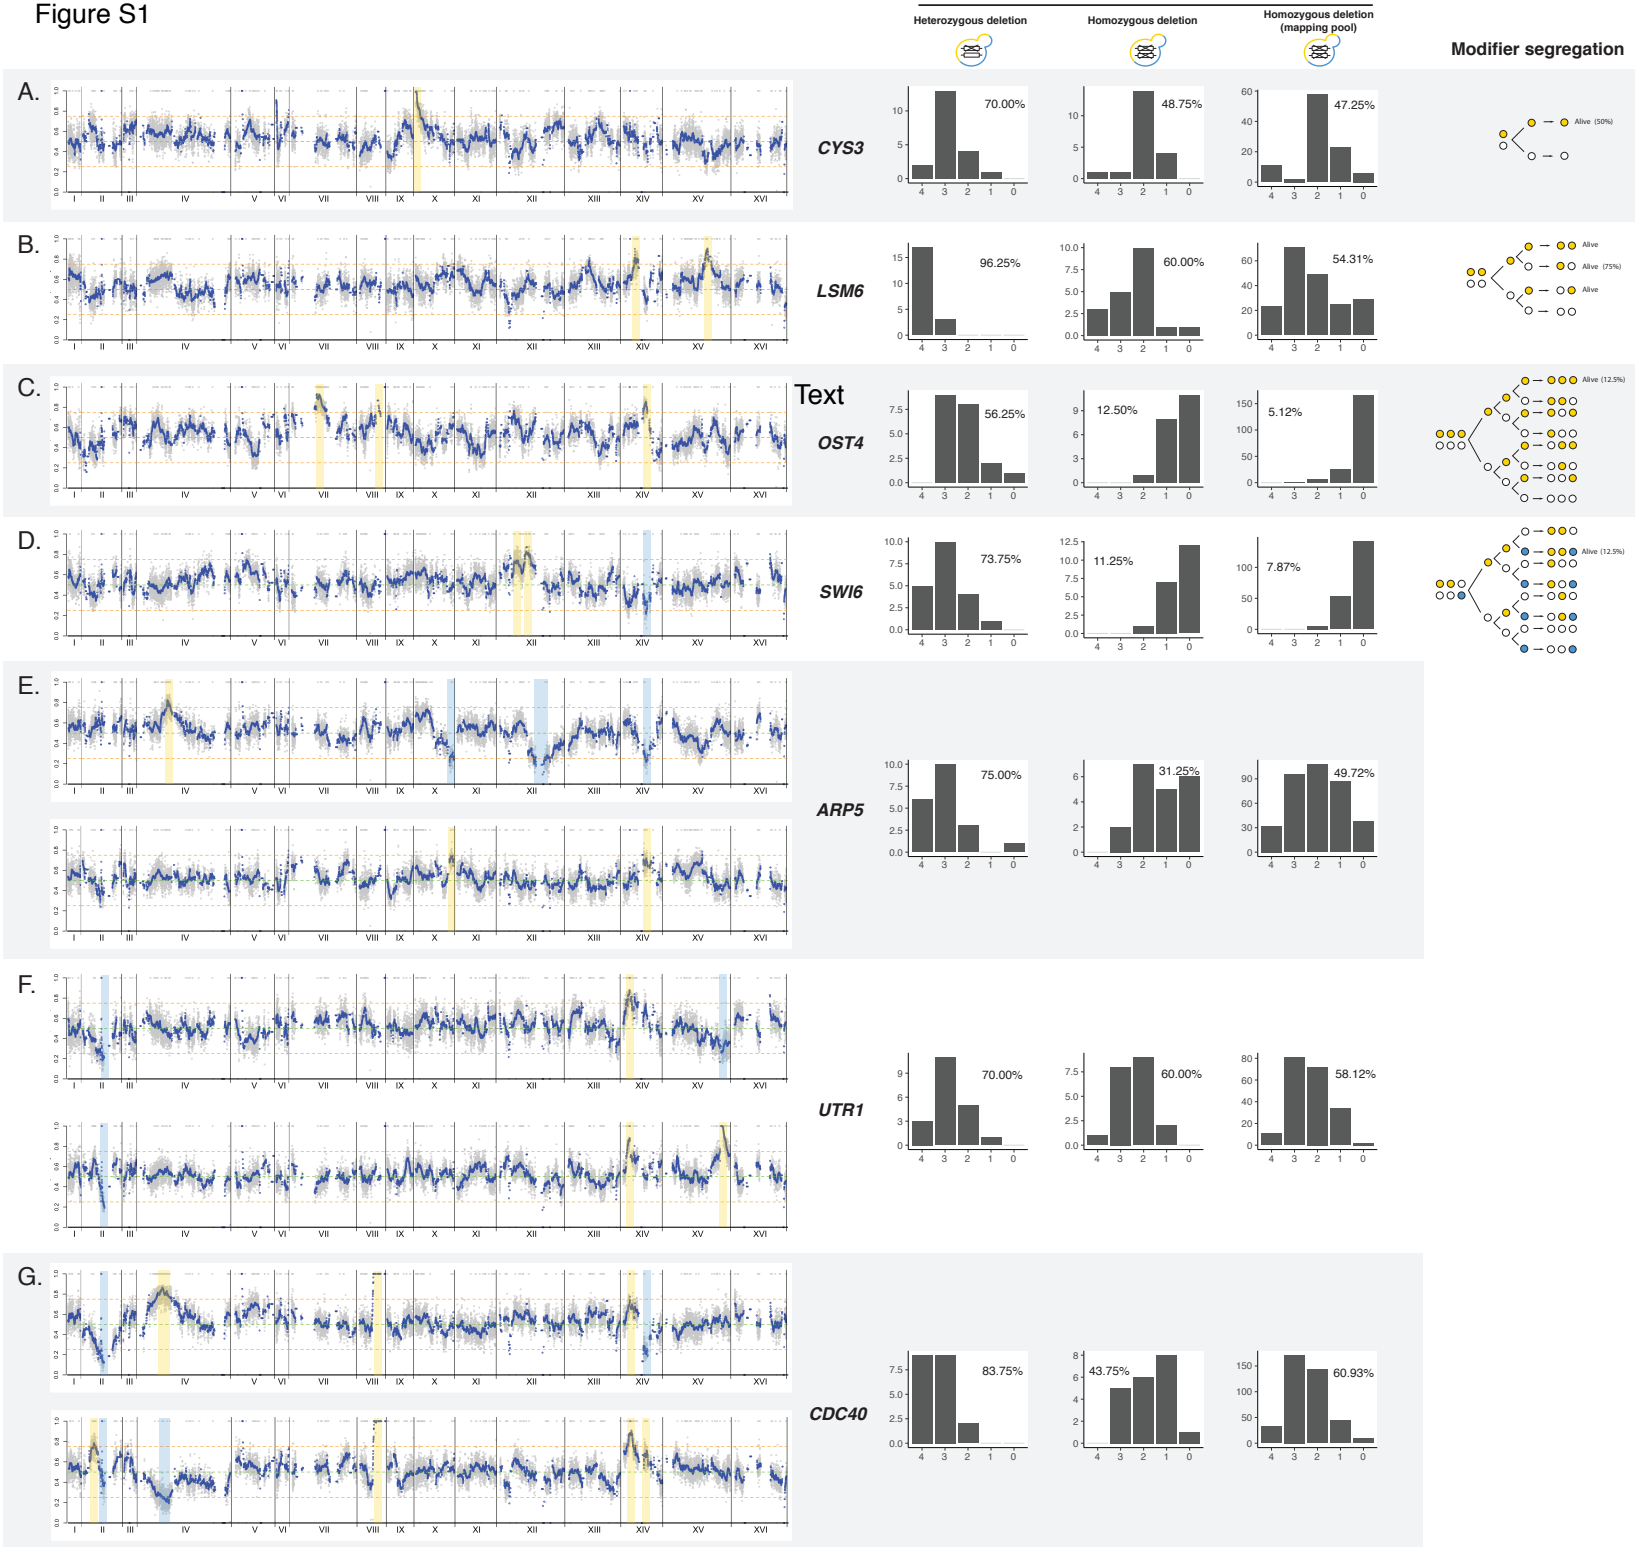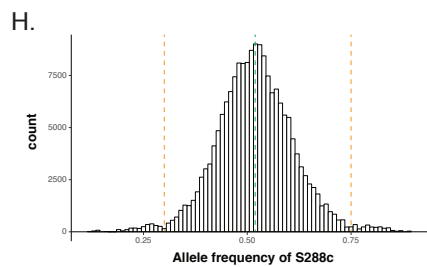

A. Figure S2

```

1 [ . . . . . : . . . . . 80
1 OPT1PR_sigma CTTAGCAATCGTTGTTGAAGAAAGAGAGCTTATCATCATGGGGTGCCCATCATTTTTTTTTCAAATTTTGG
2 OPT1PR_S288c CTTAGCAATCGTTGTTGAAGAAAGAGAGCTTATCATCATGGGGTGCCCATCA-TTTTTTTCATTTTTTTTCAAATTTTGG

81 . . . . . : . . . . . 160
1 OPT1PR_sigma GCTATTCAATGAATCGTTTCGACTATATATGGACAATCATCGGAAGCTGTGTATTCTTGGTAAAAAGTTTCGACTGTGT
2 OPT1PR_S288c GCTATTCAATGAATCGTTTCGACTATATATGGACAATCATCGGAAGCTGTGTATTCTTGGTAAAAAGTTTCGACTGTGT

161 . . . . . 2 ] 205
1 OPT1PR_sigma GGCAGAAAATAACCGCAACAATTATATAACGTCACAGAACACATG
2 OPT1PR_S288c GGCAGAAAATAACCGCAACAATTATATAACGTCACAGAACACATG

```

B.

```

1 [ . . . . . : . . . . . 80
1 MET1_S288c MVRDLVTLPSSLPLITAGFATDQVHLLIGTGSTDSVSVCKNRIHSILNAGGNPIVVPNPSSPSHTKQLQLEFGKFAKFEIV
2 MET1_sigma MVRDLVTLPSSLPLITAGFATDQVHLLIGTGSTDSVSVCKNRIHSILNAGGNPIVVPNPSSPSHTKQLQLEFGKFAKFEIV
3 MET1_K12_2 MVRDLVTLPSSLPLITAGFATDQVHLLIGTGSTDSVSVCKNRIHSILNAGGNPIVVPNPSSPSHTKQLQLEFGKFAKFEIV
4 MET1_Y12 MVRDLVTLPSSLPLITAGFATDQVHLLIGTGSTDSVSVCKNRIHSILNAGGNPIVVPNPSSPSHTKQLQLEFGKFAKFEIV
5 MET1_K12 MVRDLVTLPSSLPLITAGFATDQVHLLIGTGSTDSVSVCKNRIHSILNAGGNPIVVPNPSSPSHTKQLQLEFGKFAKFEIV

81 . . . . . : . . . . . 160
1 MET1_S288c EREFRLSDLTTLGRVLVCKVVDVRFVDLPITQSRLCEEIFWQCQKLRIPINTFHKPEFSTFNMIPTWVDPKGSGLQISVT
2 MET1_sigma EREFRLSDLTTLGRVLVCKVVDVRFVDLPITQSRLCEEIFWQCQKLRIPINTFHKPEFSTFNMIPTWVDPKGSGLQISVT
3 MET1_K12_2 EREFRLSDLTTLGRVLVCKVVDVRFVDLPITQSRLCEEIFWQCQKLRIPINTFHKPEFSTFNMIPTWVDPKGSGLQISVT
4 MET1_Y12 EREFRLSDLTTLGRVLVCKVVDVRFVDLPITQSRLCEEIFWQCQKLRIPINTFHKPEFSTFNMIPTWVDPKGSGLQISVT
5 MET1_K12 EREFRLSDLTTLGRVLVCKVVDVRFVDLPITQSRLCEEIFWQCQKLRIPINTFHKPEFSTFNMIPTWVDPKGSGLQISVT

161 . . . . . 2 . . . . . 240
1 MET1_S288c TNGNGYILANRIKRDII SHLPPNISEVVINMGYLDRI INEDHKALLEEKYYQTDMSLPGFGYGLDEDGWESHKFNKLIR
2 MET1_sigma TNGNGYILANRIKRDII SHLPPNISEVVINMGYLDRI INEDHKALLEEKYYQTDMSLPGFGYGLDEDGWESHKFNKLIR
3 MET1_K12_2 TNGNGYILANRIKRDII SHLPPNISEVVINMGYLDRI INEDHKALLEEKYYQTDMSLPGFGYGLDEDGWESHKFNKLIR
4 MET1_Y12 TNGNGYILANRIKRDII SQLPPNISEVVINMGYLDRI INEDHKALLEEKYYQTDMSLPGFGYGLDEDGWESHKFNKLIR
5 MET1_K12 TNGNGYILANRIKRDII SQLPPNISEVVINMGYLDRI INEDHKALLEEKYYQTDMSLPGFGYGLDEDGWESHKFNKLIR

241 . . . . . 3 . . . . . 320
1 MET1_S288c EFEMTSREQLKRTRWLSQIMEEYPMNKLSDIKLEDFETSSSPNKKTKQETVTEGVVPTDENIENGTQQLQSEVKKEE
2 MET1_sigma EFEMTSREQLKRTRWLSQIMEEYPMNKLSDIKLEDFETSSSPNKKTKQETVTEGAVPPTDENIENGTQQLQSEVKKEE
3 MET1_K12_2 EFEMTSREQLKRTRWLSQIMEEYPMNKLSDIKLEDFETSSSPNKKTKQETVTEGVVPTDENIENGTQQLQSEVKKEE
4 MET1_Y12 EFEMTSREQLKRTRWLSQIMEEYPMNKLSDIKLEDFETSSSPNKKTKQETVTEGVVPTDENIENGTQQLQSEVKKEE
5 MET1_K12 EFEMTSREQLKRTRWLSQIMEEYPMNKLSDIKLEDFETSSSPNKKTKQETVTEGVVPTDENIENGTQQLQSEVKKEE

321 . . . . . : . . . . . 4 400
1 MET1_S288c GPKKLGKISLVGSGPGSVSMLTIGALQEIKSADIILADKLVQAAILDLIPPKTETTFIAKKFPGNAERAQQELLAKGLES
2 MET1_sigma GPKKLGKISLVGSGPGSVSMLTIGALQEIKSADIILADKLVQAAILDLIPPKTETTFIAKKFPGNAERAQQELLAKGLES
3 MET1_K12_2 GPKKLGKISLVGSGPGSVSMLTIGALQEIKSADIILADKLVQAAILDLIPPKTETTFIAKKFPGNAERAQQELLAKGLES
4 MET1_Y12 GPKKLEKISLVGSGPGSVSMLTIGALQEIKSADIILADKLVQAAILDLIPPKTETTFIAKKFPGNAERAQQELLAKGLES
5 MET1_K12 GPKKLEKISLVGSGPGSVSMLTIGALQEIKSADIILADKLVQAAILDLIPPKTETTFIAKKFPGNAERAQQELLAKGLES

401 . . . . . : . . . . . 480
1 MET1_S288c DNGLKVVRLKQGDPIYIFGRGGEEFNFFKDHGYIPVVLPGISSLACTVLAQIPATQRDIADQVLICTGTGRKGALPIIPE
2 MET1_sigma DNGLKVVRLKQGDPIYIFGRGGEEFNFFKDHGYIPVVLPGISSLACTVLAQIPATQRDIADQVLICTGTGRKGALPIIPE
3 MET1_K12_2 DNGLKVVRLKQGDPIYIFGRGGEEFNFFKDHGYIPVVLPGISSLACTVLAQIPATQRDIADQVLICTGTGRKGALPIIPE
4 MET1_Y12 DNGLKVVRLKQGDPIYIFGRGGEEFNFFKDHGYIPVVLPGISSLACTVLAQIPATQRDIADQVLICTGTGRKGALPIIPE
5 MET1_K12 DNGLKVVRLKQGDPIYIFGRGGEEFNFFKDHGYIPVVLPGISSLACTVLAQIPATQRDIADQVLICTGTGRKGALPIIPE

481 . . . . . 5 . . . . . : . . . . . 560
1 MET1_S288c FVESRTTVFLMALHRANVLITGLLKHGWDGDPVAAIIVERGSCPDQRVTRTLLKVVPEVVEEIGSRPPGVLVVGKAVNALV
2 MET1_sigma FVESRTTVFLMALHRANVLITLLLKHGWDGDPVAAIIVERGSCPDQRVTRTLLKVVPEVVEEIGSRPPGVLVVGKAVNALV
3 MET1_K12_2 FVESRTTVFLMALHRANVLITLLLKHGWDGDPVAAIIVERGSCPDQRVTRTLLKVVPEVVEEIGSRPPGVLVVGKAVNALV
4 MET1_Y12 FVESRTTVFLMALHRANVLITLLLKHGWDSDVPAIIVERGSCPDQRVTRTLLKVVPEVVEEIGSRPPGVLVVGKAVNALV
5 MET1_K12 FVESRTTVFLMALHRANVLITLLLKHGWDSDVPAIIVERGSCPDQRVTRTLLKVVPEVVEEIGSRPPGVLVVGKAVNALV

561 . . . . . ] 594
1 MET1_S288c EKDLINFDESRKRFVIDEGFREFEVDVDSLFKLYX
2 MET1_sigma EKDLINFDESRKRFVIDEGFREFEVDVDSLFKLYX
3 MET1_K12_2 EKDLINFDESRKRFVIDEGFREFEVDVDSLFKLYX
4 MET1_Y12 EKDLINFDESRKRFVIDEGFREFEVDVDSLFKXYX
5 MET1_K12 EKDLINFDESRKRFVIDEGFREFEVDVDSLFKXYX

```
